# Supplementary material
Source: publisher site journal article supplement (https://www.dovepress.com/article/386780)
Supplement: Supplementary file 1 [file get_supplementary_file.php]

Appendix: The scales used in the study (translated from Chinese)

**Study Engagement Scale**

*Active Learning*

1. I will review in time what the teacher has taught me in class.

2. I will study consistently, not just before the exam.

3. I will study in advance what the teacher has taught me in class.

4. I will plan my week in advance.

5. I will schedule a regular time for homework every week.

***Teacher-student interaction***

1.Teacher gives useful feedback on our work.

2. I get useful suggestions from the teacher.

3.Teacher provides us with various kinds of guidance or tutoring outside of class.

4. I am clear about the teacher's teaching objectives.

5. Teacher often encourages us to speak up.

***Peer interaction***

1. I am willing to share my learning experience with my classmates.

2. I have a lot of communication with my classmates.

3. I am willing to work with my classmates to complete the homework assigned by the teacher.

4. I actively participate in group discussions.

5. I have a good relationship with my classmates.

***Deep Cognitive Strategies***

1. When studying, I try to come up with my own opinion.

2. When reading, I try to understand the author's intentions.

3. when reading, I stop and think about what I have learned.

4. I ask my own questions about what I have learned.

***Passion for Learning***

1. learning gives me a strong sense of satisfaction.

2. I am curious about what I am learning.

3. I study hard because I am interested in learning.

**Critical Thinking Scale**

***Finding the truth***

1.Facing a controversial topic, it is extremely difficult to choose one of the different opinions.

2.If I have four reasons to agree with something and only one reason to disagree with it, I will choose to agree with it.

3.Even if there is evidence that does not match my idea, I will stick to my idea.

4.When dealing with complex issues, I feel frightened and overwhelmed.

5.When I express my opinion, it is impossible to remain objective.

6.I will only look for some facts that support my view, and not to find some facts that oppose my view

7.There are many issues that I would be afraid to look for the truth.

8. since I know how to make this decision, I will not repeatedly consider other options.

9.We do not know what criteria should be used to measure most of the issues.

10.Personal experience is the only criterion to verify the truth.

***Open-mindedness***

1.It is important for me to know what others think about things.

2.I am trying to make less subjective judgments.

3.It is meaningful to study what foreigners think.

4. When faced with a difficulty, it is important to consider all possibilities of the event, which is impossible for me to do.

5.In a group discussion, if someone's opinion is considered wrong by others, he has no right to express his opinion.

6.Foreigners should learn about our culture, not ask us to learn about theirs.

7.Others should not force me to defend my opinion.

8.It is not so important to be open to different worldviews (e.g., evolution, theism).

9.Everyone has the right to express their opinions, but I will not pay attention to them.

10.I will not question what everyone takes for granted.

***Analysis ability***

1.I get anxious when others only use shallow arguments to escort good ideas.

2.All my beliefs must be supported by grounds.

3.To disagree with someone else's opinion, I have to give reasons.

4.I find myself often evaluating other people's arguments.

5.I can be considered a logical person.

6.When dealing with difficult problems, I must first figure out the crux of the problem.

7.I am good at going through problems in an organized way.

8.I am not a very logical person, but often pretend to be logical.

9.It is impossible to know which one is the better solution.

10.Life experience has taught me that I don't have to be too logical in dealing with things.

***Systematic Capabilities***

1.I always analyze the focus of a question before I answer it.

2.It is easy for me to organize my thinking.

3.I am good at planning a systematic plan to solve complex problems.

4, I often repeatedly think about the right and wrong in practice and experience.

5、My attention is easily affected by the external environment.

6、I can constantly talk about a problem, but do not care whether the problem is solved.

7、When I see a new product manual is complex and difficult to understand, I will give up reading on.

8、People say I am too impulsive in making decisions.

9、People think I am indecisive when making decisions.

10、My opinions on controversial topics mostly follow the last person I talked to.

***Self-confidence in critical thinking***

1. I appreciate that I have the ability to think accurately.

2. Tests that require thinking rather than answering from memory are better for me.

3. I am appreciated by others for my curiosity and desire to learn.

4.When faced with a problem, my peers look to me for decisions because I can make an objective analysis.

5.I am satisfied with my ability to come up with creative choices.

6.When making decisions, others look to me to set appropriate guidelines for guidance.

7. I have a strong desire to learn.

8.I am satisfied with my ability to understand the views of others.

9.When problems become difficult, others look to me to continue to deal with them.

10. I am afraid to ask questions in class.

***Desire for knowledge***

1.Studying new things can make my life richer.

2.When faced with an important decision, I try to gather all relevant information beforehand.

3.I look forward to facing challenging things.

4.Solving difficult problems is fun.

5.I like to find out how things work.

6.No matter what the topic is, I am eager to know more about it.

7.I will try to learn everything, even if I don't know when they are useful.

8.Most of the courses in school are boring and not worth taking.

9.Mandatory subjects in school are a waste of time.

10.It is not so important to actively try to solve all kinds of difficult problems.

***Cognitive maturity***

1.The best arguments often come from the instantaneous feeling of a certain problem.

2.The so-called truth is no more than a personal opinion.

3.Paying a high price (e.g., money, time, energy) will definitely lead to a better opinion.

4.When I hold an open attitude, I do not know what is true and what is false.

5.If possible, I will try to avoid reading.

6.The best way to solve difficult problems is to ask others for answers.

7.I have no doubt about what I believe in myself.

8.Use "metaphor" to understand the problem, like driving a boat on the highway.

9.The essence of a thing and its appearance are the same.

10.The decision made by a powerful person is the right decision.
